# Supplementary material
Source: publisher site journal article supplement (https://www.dovepress.com/article/165822)
Supplement: Supplementary file 1 [file get_supplementary_file.php]

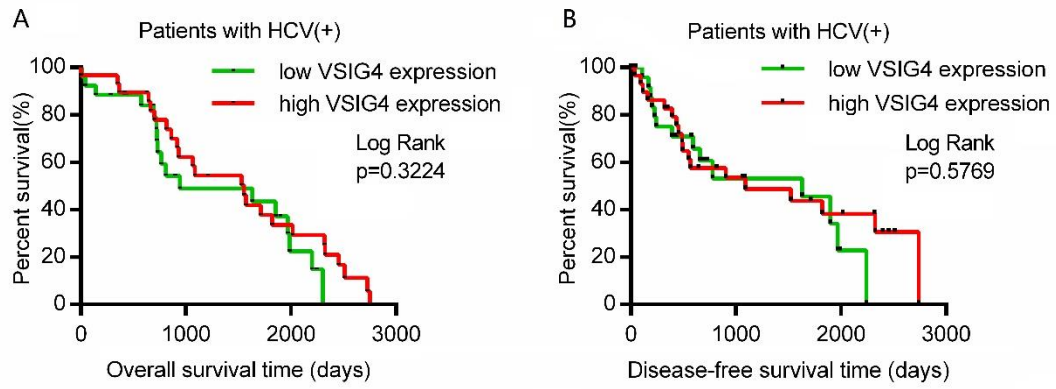

Figure S1: Correlation between VSIG4 expression and survival of HCC patients with HCV. (A) OS curves of HCC patients with HCV infection. (B) DFS curves of HCC patients with HCV infection. Log rank test, \*P < 0.05, \*\*P < 0.01.

Table S2: Cox regression analysis of VSIG4 and clinicopathological characteristics for OS and DFS of HCC patients with HBV.

| Clinicopathological Characteristics |                                                                   | OS                     |                      | DFS                   |               |
|-------------------------------------|-------------------------------------------------------------------|------------------------|----------------------|-----------------------|---------------|
|                                     |                                                                   | HR (95% CI)            | P value <sup>b</sup> | HR (95% CI)           | P value       |
| Age(years)                          | ≤45 VS. >45                                                       | 0.379 (0.074 - 1.940)  | 0.244                | 0.786 (0.227 - 2.714) | 0.703         |
| Gender                              | Male VS. Female                                                   | 1.485 (0.587 - 3.756)  | 0.404                | 1.313 (0.543 - 3.172) | 0.545         |
| Child-Pugh                          | A VS. B/C                                                         | 0.925 (0.251 - 3.107)  | 0.907                | 1.491 (0.539 - 4.120) | 0.442         |
| Cirrhosis                           | No VS. Yes                                                        | 0.594 (0.205 - 1.718)  | 0.336                | 0.424 (0.182 - 0.988) | 0.047*        |
| AFP(ug/L)                           | ≤400 VS. >400                                                     | 0.256 (0.071 - 0.927)  | 0.038*               | 0.413 (0.117 - 1.457) | 0.169         |
|                                     | T <sub>1</sub> /T <sub>2</sub> VS. T <sub>3</sub> /T <sub>4</sub> | 1.255 (0.461 - 3.417)  | 0.657                | 0.771 (0.311 - 1.910) | 0.573         |
| TNM stage                           | N <sub>0</sub> VS. N <sub>1</sub>                                 | 1.014 (0.384 - 2.680)  | 0.977                | 1.022 (0.430 - 2.430) | 0.961         |
|                                     | M <sub>0</sub> VS. M <sub>1</sub>                                 | 3.259 (0.895 - 11.863) | 0.073                | 0.929 (0.354 - 2.437) | 0.881         |
| Differentiation                     | High/Moderate VS. Low                                             | 0.552 (0.223 - 1.365)  | 0.199                | 0.524 (0.228 - 1.204) | 0.128         |
| VSIG4 Expression                    | Low VS. High <sup>a</sup>                                         | 5.129 (1.593 - 16.516) | <b>0.006*</b>        | 3.390 (1.271 - 9.042) | <b>0.015*</b> |

Abbreviations: HR = hazard ratio; 95%CI = 95% confidence interval; AFP = alpha-fetoprotein.

a: The median expression level of VSIG4 was used as the cutoff. Low VSIG4 expression in each of the 32 patients was defined as a value below the 50th percentile. High VSIG4 expression in each of the 32 patients was defined as a value above the 50th percentile.

b: Cox regression, \*P < 0.05, \*\*P < 0.01.

Table S3: Relationship between the VSIG4 expression and clinicopathological characteristics in HBV-positive HCC patients

| Clinicopathological Characteristics |                | VSIG4 expression |             | P value <sup>a</sup> |
|-------------------------------------|----------------|------------------|-------------|----------------------|
|                                     |                | Low (N=29)       | High (N=35) |                      |
| Age(years)                          | ≤45            | 4                | 4           | 0.776                |
|                                     | >45            | 25               | 31          |                      |
| Gender                              | Male           | 20               | 19          | 0.231                |
|                                     | Female         | 9                | 16          |                      |
| Child-Pugh                          | A              | 23               | 28          | 0.716                |
|                                     | B              | 4                | 6           |                      |
|                                     | C              | 2                | 1           |                      |
| Cirrhosis                           | Yes            | 10               | 15          | 0.494                |
|                                     | No             | 19               | 20          |                      |
| AFP (ug/L)                          | ≤400           | 22               | 33          | <b>0.035*</b>        |
|                                     | >400           | 7                | 2           |                      |
| TNM stage                           | T <sub>1</sub> | 15               | 18          | 0.971                |
|                                     | T <sub>2</sub> | 7                | 10          |                      |
|                                     | T <sub>3</sub> | 6                | 6           |                      |
|                                     | T <sub>4</sub> | 1                | 1           |                      |
|                                     | N <sub>0</sub> | 20               | 25          |                      |
|                                     | N <sub>1</sub> | 9                | 10          |                      |
|                                     | M <sub>0</sub> | 18               | 30          |                      |
|                                     | M <sub>1</sub> | 11               | 5           |                      |
| Histological grade                  | G1             | 6                | 5           | 0.744                |
|                                     | G2             | 15               | 21          |                      |
|                                     | G3             | 8                | 9           |                      |

a: Chi-square test, \*P<0.05.

Table S4: Relationship between the VSIG4 expression and clinicopathological characteristics in HBV-negative HCC patients

| Clinicopathological Characteristics |                | VSIG4 expression |             | P value <sup>a</sup> |
|-------------------------------------|----------------|------------------|-------------|----------------------|
|                                     |                | Low (N=62)       | High (N=56) |                      |
| Age(years)                          | ≤45            | 8                | 8           | 0.827                |
|                                     | >45            | 54               | 48          |                      |
| Gender                              | Male           | 43               | 43          | 0.365                |
|                                     | Female         | 19               | 13          |                      |
| Child-Pugh                          | A              | 55               | 48          | 0.877                |
|                                     | B              | 5                | 6           |                      |
|                                     | C              | 2                | 2           |                      |
| Cirrhosis                           | Yes            | 21               | 24          | 0.316                |
|                                     | No             | 41               | 32          |                      |
| AFP (ug/L)                          | ≤400           | 46               | 47          | 0.196                |
|                                     | >400           | 16               | 9           |                      |
| TNM stage                           | T <sub>1</sub> | 38               | 29          | 0.753                |
|                                     | T <sub>2</sub> | 11               | 14          |                      |
|                                     | T <sub>3</sub> | 11               | 10          |                      |
|                                     | T <sub>4</sub> | 2                | 3           |                      |
|                                     | N <sub>0</sub> | 49               | 48          |                      |
| N <sub>1</sub>                      | 13             | 8                |             |                      |
|                                     | M <sub>0</sub> | 48               | 50          | 0.086                |
|                                     | M <sub>1</sub> | 14               | 6           |                      |
| Histological grade                  | G1             | 8                | 10          | 0.595                |
|                                     | G2             | 34               | 32          |                      |
|                                     | G3             | 20               | 14          |                      |

a: Chi-square test, \*P<0.05.

Table S5: Relationship between the VSIG4 expression and clinicopathological characteristics in HCC patients with HCV

| Clinicopathological Characteristics |                | VSIG4 expression |             | P value <sup>a</sup> |
|-------------------------------------|----------------|------------------|-------------|----------------------|
|                                     |                | Low (N=26)       | High (N=32) |                      |
| Age(years)                          | ≤45            | 2                | 7           | 0.138                |
|                                     | >45            | 24               | 25          |                      |
| Gender                              | Male           | 17               | 21          | 0.985                |
|                                     | Female         | 9                | 11          |                      |
| Child-Pugh                          | A              | 22               | 26          | 0.909                |
|                                     | B              | 3                | 4           |                      |
|                                     | C              | 1                | 2           |                      |
| Cirrhosis                           | Yes            | 10               | 13          | 0.867                |
|                                     | No             | 16               | 19          |                      |
| AFP (ug/L)                          | ≤400           | 23               | 25          | 0.300                |
|                                     | >400           | 3                | 7           |                      |
| TNM stage                           | T <sub>1</sub> | 20               | 17          | 0.432                |
|                                     | T <sub>2</sub> | 2                | 5           |                      |
|                                     | T <sub>3</sub> | 3                | 7           |                      |
|                                     | T <sub>4</sub> | 1                | 2           |                      |
|                                     | N <sub>0</sub> | 21               | 26          | 0.537                |
|                                     | N <sub>1</sub> | 4                | 3           |                      |
|                                     | M <sub>0</sub> | 20               | 29          | 0.152                |
|                                     | M <sub>1</sub> | 6                | 3           |                      |
| Histological grade                  | G1             | 3                | 5           | 0.689                |
|                                     | G2             | 13               | 18          |                      |
|                                     | G3             | 10               | 9           |                      |

a: Chi-square test, \*P<0.05, \*\*P<0.01.
